# Supplementary material
Source: MDPI journal article supplement (https://www.mdpi.com/2673-7051/4/2/17)
Supplement: s1 [file s1]

**Supplementary material. Questionnaire on individual and environmental determinants of the consumption of iron-rich foods among adolescent girls**

**SECTION 1 : Intention**

What is your personal opinion with regards to the following statement?

1- I have the intention to consume iron-rich foods/IRF each day.



|                                                                                    |                                                                                    |                                                                                    |                                                                                     |                                                                                      |
|------------------------------------------------------------------------------------|------------------------------------------------------------------------------------|------------------------------------------------------------------------------------|-------------------------------------------------------------------------------------|--------------------------------------------------------------------------------------|
| Strongly disagree                                                                  | Disagree                                                                           | Neither disagree, Nor agree                                                        | Agree                                                                               | Strongly agree                                                                       |
|  |  |  |  |  |

**Supplementary material. Questionnaire on individual and environmental determinants of the consumption of iron-rich foods among adolescent girls**

**SECTION 2 : Attitude**

What is your personal opinion with regards to the following statements?



|                                                                                   |                                                                                   |                                                                                   |                                                                                    |                                                                                     |
|-----------------------------------------------------------------------------------|-----------------------------------------------------------------------------------|-----------------------------------------------------------------------------------|------------------------------------------------------------------------------------|-------------------------------------------------------------------------------------|
| Strongly disagree                                                                 | Disagree                                                                          | Neither disagree, Nor agree                                                       | Agree                                                                              | Strongly agree                                                                      |
|  |  |  |  |  |

2.1 For me, consuming IRF each day would be very useful.

2.2 For me, there is no disadvantage in consuming IRF each day.

**Supplementary material. Questionnaire on individual and environmental determinants of the consumption of iron-rich foods among adolescent girls**

**SECTION 3 : Behavioral beliefs**

What is your personal opinion with regards to the following statements?

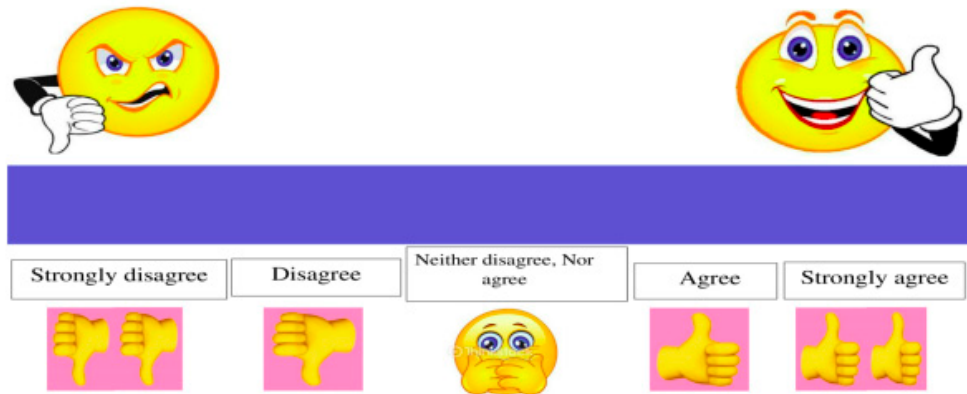

| Strongly disagree                                                                 | Disagree                                                                          | Neither disagree, Nor agree                                                       | Agree                                                                              | Strongly agree                                                                      |
|-----------------------------------------------------------------------------------|-----------------------------------------------------------------------------------|-----------------------------------------------------------------------------------|------------------------------------------------------------------------------------|-------------------------------------------------------------------------------------|
|  |  |  |  |  |

If I consume IRF each day, this will...

- 3.1 Allow me to be in good health (good physical and mental health)
- 3.2 Allow me to grow well
- 3.3 Allow me to be less tired
- 3.4 Will prevent anaemia
- 3.5 Will allow me to make up blood loss during menses
- 3.6 Will allow me to have a lot of vitamins
- 3.7 Can cause a weight gain
- 3.8 Can cause illnesses such as diarrhea, hypertension, indigestion, etc.
- 3.9 Can cause problems during menstruations

**Supplementary material. Questionnaire on individual and environmental determinants of the consumption of iron-rich foods among adolescent girls**

**SECTION 4 : Subjective norm**

What is your personal opinion with regards to the following statements?



|                                                                                   |                                                                                   |                                                                                   |                                                                                    |                                                                                     |
|-----------------------------------------------------------------------------------|-----------------------------------------------------------------------------------|-----------------------------------------------------------------------------------|------------------------------------------------------------------------------------|-------------------------------------------------------------------------------------|
| Strongly disagree                                                                 | Disagree                                                                          | Neither disagree, Nor agree                                                       | Agree                                                                              | Strongly agree                                                                      |
|  |  |  |  |  |

4.1 Most people who are important to me would recommend that I eat IRF each day

4.2 People who are the most important for me think that I should eat IRF each day

4.3 If I consume IRF each day, nobody will disagree

**Supplementary material. Questionnaire on individual and environmental determinants of the consumption of iron-rich foods among adolescent girls**

**SECTION 5 : Normative beliefs**

Do you think that the following persons will approve or disapprove that you consume IRF each day?

|   |                                                                                   |                                                                                   |                                                                                    |                                                                                     |
|-----------------------------------------------------------------------------------------------------------------------------------------------------------------------|-----------------------------------------------------------------------------------|-----------------------------------------------------------------------------------|------------------------------------------------------------------------------------|-------------------------------------------------------------------------------------|
| Désapprouveraient<br>fortement                                                                                                                                        | Désapprouveraient<br>légèrement                                                   | Ni désapprouveraient<br>ni approuveraient                                         | Approuveraient<br>légèrement                                                       | Approuveraient<br>fortement                                                         |
|                                                                                      |  |  |  |  |

5.1 Your father

5.2 Your mother

5.3 Your sisters

5.4 Your brothers

5.5 Your cousins (male)

5.6 Your cousins (female)

5.7 Your aunts

5.8 Your uncles

5.9 Your grand-mother

5.10 Your grand-father

5.11 Your friends

**Supplementary material. Questionnaire on individual and environmental determinants of the consumption of iron-rich foods among adolescent girls**

**SECTION 6: Perceived behavioral control**

What is your personal opinion with regards to the following statements?



| Strongly disagree                                                                 | Disagree                                                                          | Neither disagree, Nor agree                                                       | Agree                                                                              | Strongly agree                                                                      |
|-----------------------------------------------------------------------------------|-----------------------------------------------------------------------------------|-----------------------------------------------------------------------------------|------------------------------------------------------------------------------------|-------------------------------------------------------------------------------------|
|  |  |  |  |  |

6.1 I feel able to consume IRF each day

6.2 For me, consuming IRF each day is easy

6.3 If I have money, I would be able to consume IRF each day

6.4 If I had more control over what we cook at home, I would be able to consume IRF each day.

**Supplementary material. Questionnaire on individual and environmental determinants of the consumption of iron-rich foods among adolescent girls**

**SECTION 7: Environment**

Do you agree or disagree that the following factors could prevent you for consuming IRF each day?



|                                                                                   |                                                                                   |                                                                                   |                                                                                    |                                                                                     |
|-----------------------------------------------------------------------------------|-----------------------------------------------------------------------------------|-----------------------------------------------------------------------------------|------------------------------------------------------------------------------------|-------------------------------------------------------------------------------------|
| Strongly disagree                                                                 | Disagree                                                                          | Neither disagree, Nor agree                                                       | Agree                                                                              | Strongly agree                                                                      |
|  |  |  |  |  |

7.1 The high price of IRF

7.2 Eating with family

7.3 At home, we don't cook IRF every day

7.4 My parents/tutors do not give me enough money to buy IRF

7.5 There are no IRF on sale near my home

7.6 At home, we don't cook a sufficient quantity of IRF
